# Supplementary material for: Metal based gels as versatile precursors to synthesize stiff and integrated MOF/polymer composite membranes
Source: Royal Society of Chemistry journal article supplement (doi:10.1039/c5ta04400f), 2015-01-01
Supplement: c5ta04400f1.pdf [file c5ta04400f1.pdf]

Electronic Supplementary Information (ESI)

**Metal based gel as versatile precursor to synthesize stiff  
and integrated MOF/polymer composite membrane**

**Pengcheng Su,<sup>a</sup> Wanbin Li,<sup>a</sup> Congyang Zhang,<sup>a</sup> Qin Meng,<sup>\*b</sup> Chong Shen<sup>b</sup>  
and Guoliang Zhang<sup>\*a</sup>**

## The Reactions

The synthetic reactions of the zinc based gel can be written as follows<sup>S1,2</sup>:

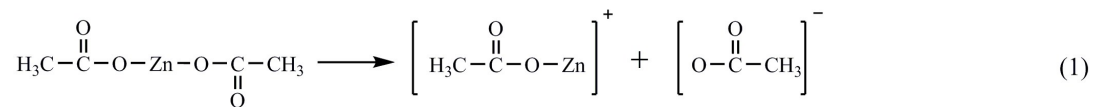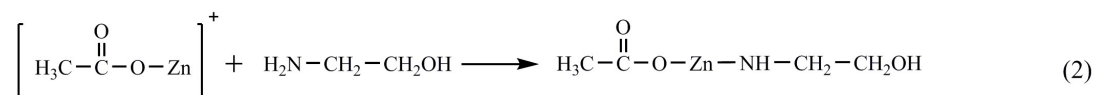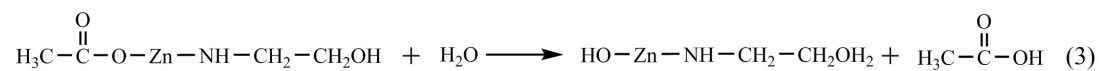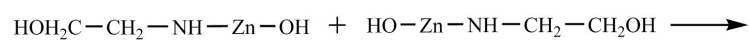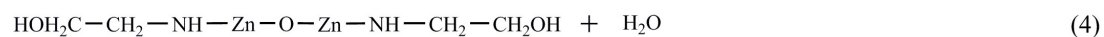

Note: The water in the step 3 comes from the crystal water in zinc acetate dihydrate.

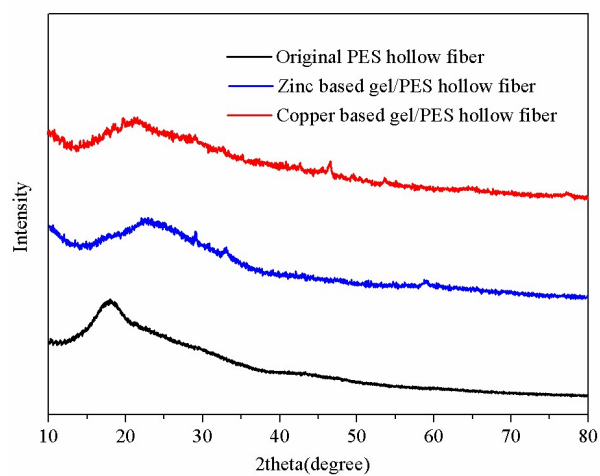

**Fig. S1** XRD patterns of the prepared hollow fibers.

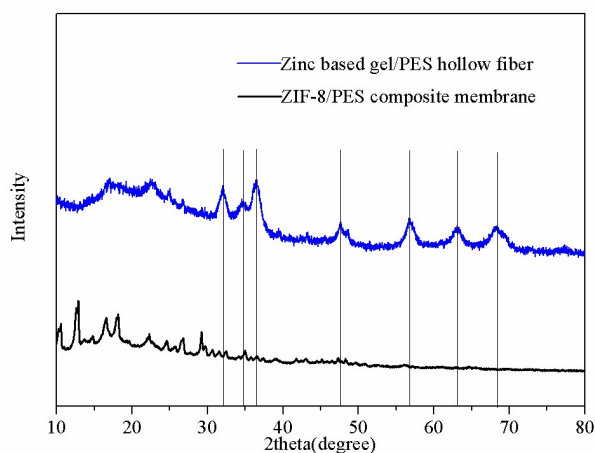

**Fig. S2** XRD patterns of the zinc based gel/PES hollow fiber and the ZIF-8/PES composite membrane after the treatment in the oven for 200 °C and 4 hours.

The zinc based gel/PES hollow fiber and ZIF-8/PES composite membrane were placed in the oven for 200 °C and 4 hours. The characteristic peaks of zinc oxide appeared obviously in the XRD pattern of zinc based gel/PES hollow fiber after high temperature treatment. However, there was no peak appeared in the ZIF-8/PES composite membrane. This result strongly demonstrated that the metal based gel infiltrated was fully consumed and transformed into ZIF-8 crystals in the solvothermal treatment process.

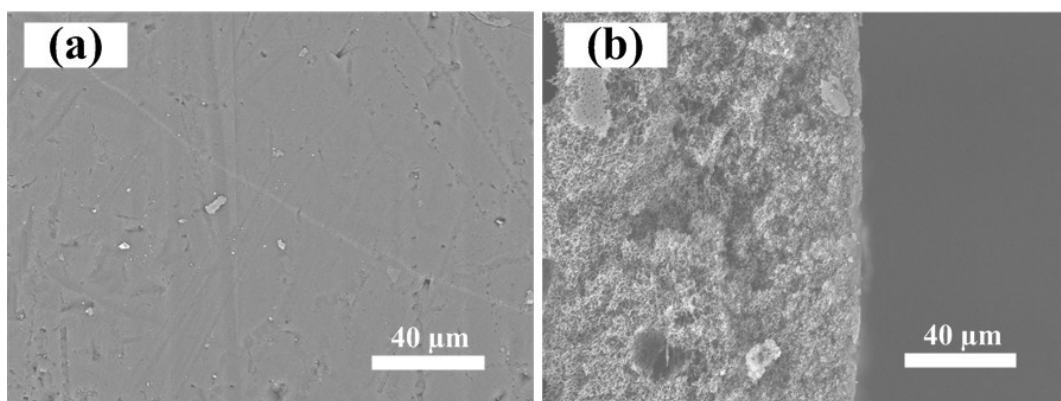

**Fig. S3** (a) Top and (b) cross section view SEM images of the original PES hollow fiber.

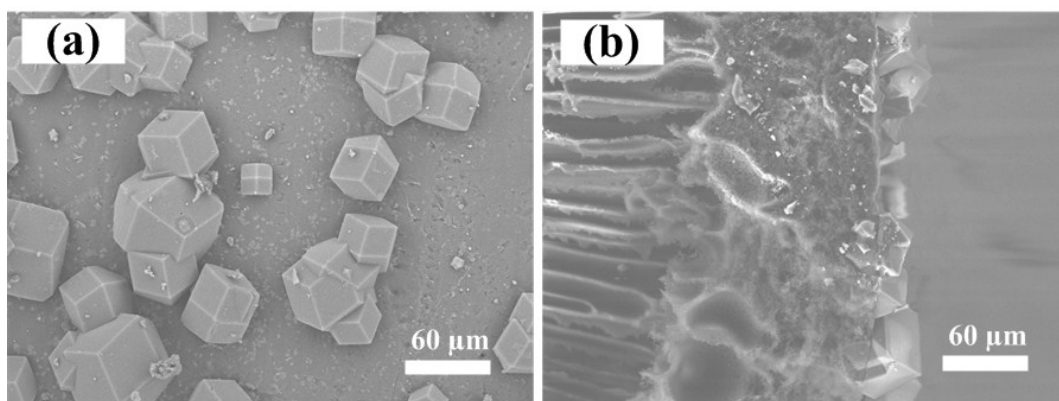

**Fig. S4** (a) Top and (b) cross section view SEM images of the ZIF-8 membrane grown on the original PES hollow fiber.

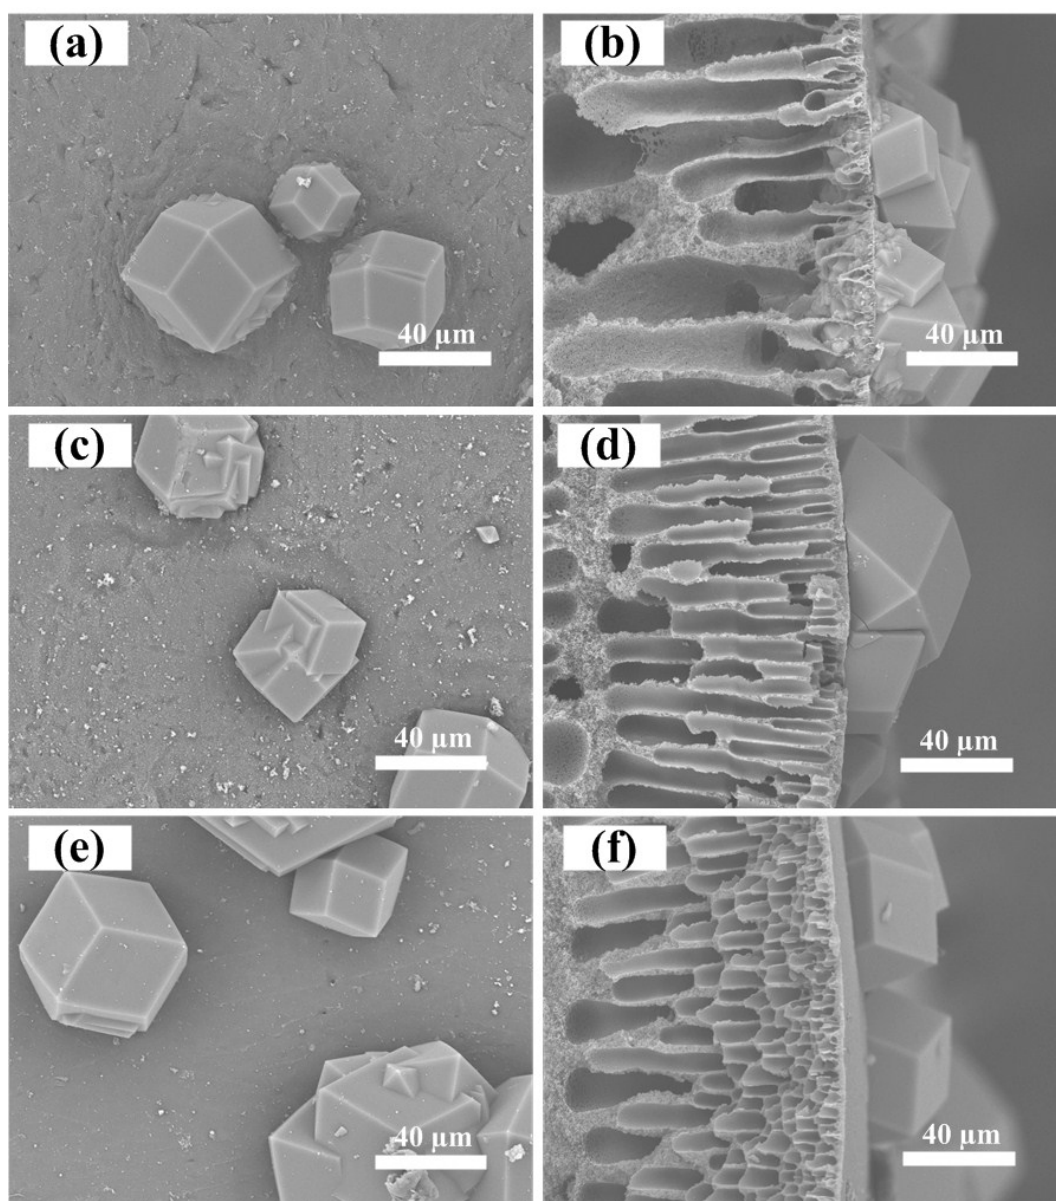

**Fig. S5** SEM images of the ZIF-8 membrane grown on the original polymer hollow fiber: (a,b) PVDF, (c,d) PSF and (e,f) PAN.

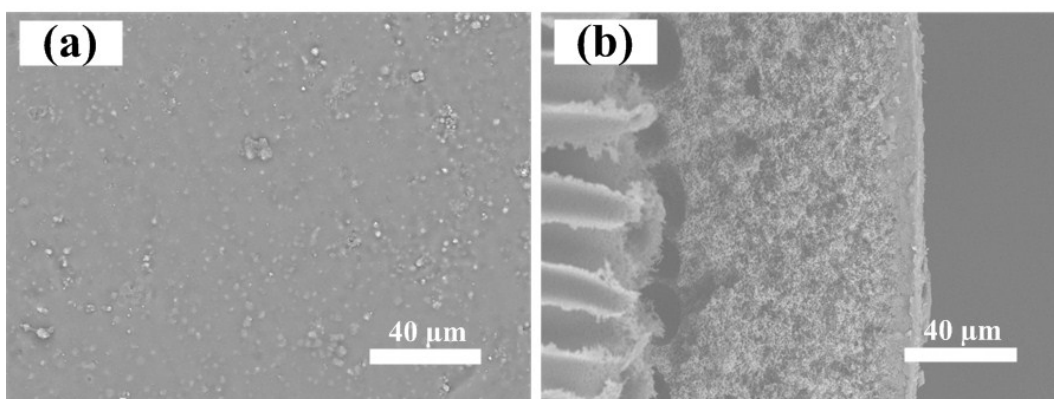

**Fig. S6** (a) Top and (b) cross section view SEM images of the copper based gel/PES hollow fiber.



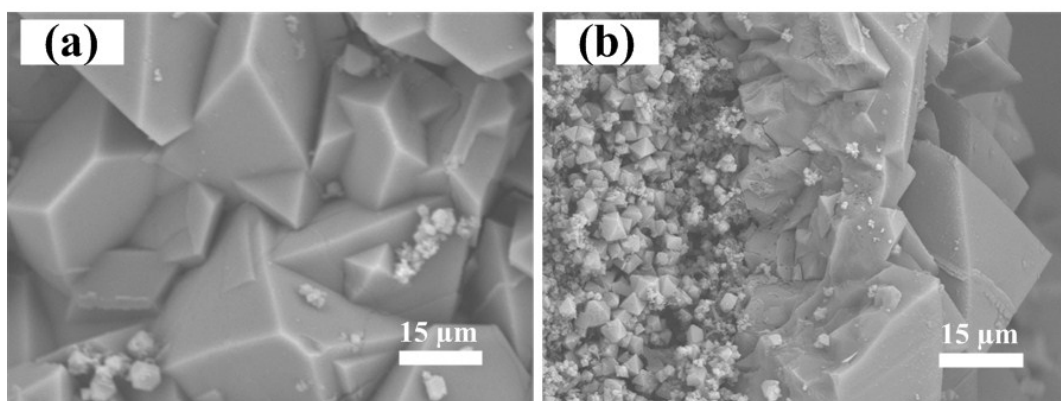

**Fig. S7** (a) Top and (b) cross section view SEM images of the  $\text{Cu}_3(\text{BTC})_2/\text{PES}$  composite membrane prepared from the copper based gel precursor.

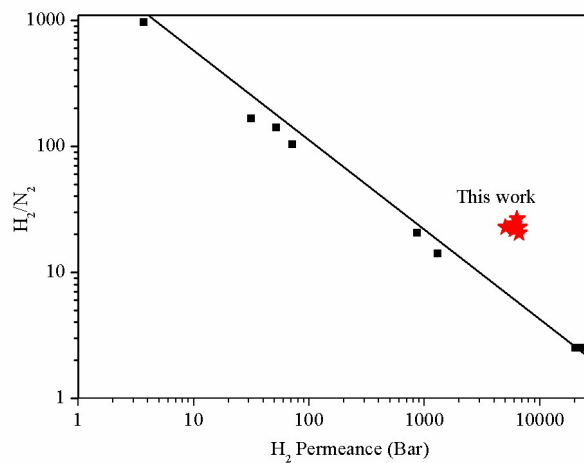

**Fig. S8** H<sub>2</sub>/N<sub>2</sub> separation performances of the prepared ZIF-8/PES composite membranes.

1 Barrer =  $3.348 \times 10^{-16}$  mol m / (m<sup>2</sup> s Pa). The m is the thickness of the membrane.

**Table S1** Gas separation properties of the ZIF-8/PES composite membranes at 20 °C and 0.05 MPa.

| Membrane | Permeance ( $10^{-9}\text{mol m}^{-2} \text{s}^{-1} \text{Pa}^{-1}$ ) |                 |                |                | Separation factor               |                                |                                |
|----------|-----------------------------------------------------------------------|-----------------|----------------|----------------|---------------------------------|--------------------------------|--------------------------------|
|          | H <sub>2</sub>                                                        | CO <sub>2</sub> | O <sub>2</sub> | N <sub>2</sub> | H <sub>2</sub> /CO <sub>2</sub> | H <sub>2</sub> /O <sub>2</sub> | H <sub>2</sub> /N <sub>2</sub> |
| M1       | 111.1                                                                 | 21.2            | 15.1           | 4.9            | 5.2                             | 7.4                            | 22.7                           |
| M2       | 99.4                                                                  | 18.9            | 13.9           | 4.1            | 5.3                             | 7.2                            | 24.2                           |
| M3       | 110.5                                                                 | 22.1            | 17.8           | 5.4            | 5.0                             | 6.2                            | 20.5                           |
| M4       | 106.2                                                                 | 20.9            | 14.0           | 4.0            | 5.1                             | 7.6                            | 26.6                           |
| M5       | 84.4                                                                  | 15.5            | 10.7           | 3.7            | 5.4                             | 7.9                            | 22.8                           |
| M6       | 100.6                                                                 | 19.2            | 13.9           | 4.6            | 5.2                             | 7.2                            | 21.9                           |
| M7       | 111.8                                                                 | 21.4            | 15.5           | 5.0            | 5.2                             | 7.2                            | 22.4                           |

Note: M1, M2, M3, M4, M5, M6 and M7 represent the prepared ZIF-8/PES composite membranes.

**Table S2** Comparison of gas separation performance of the ZIF-8/PES composite membrane in this work with other polymer supported MOF membranes in the literature.

| Membrane                           | Substrate | Pore size (nm) | Temp eratur e(°C) | H <sub>2</sub> Permeance (mol m <sup>-2</sup> s <sup>-1</sup> Pa <sup>-1</sup> ) | Separation factor               |                                | Reference |
|------------------------------------|-----------|----------------|-------------------|----------------------------------------------------------------------------------|---------------------------------|--------------------------------|-----------|
|                                    |           |                |                   |                                                                                  | H <sub>2</sub> /CO <sub>2</sub> | H <sub>2</sub> /N <sub>2</sub> |           |
| ZIF-7                              | PVDF      | 0.29           | 25                | 2.35×10 <sup>-6</sup>                                                            | 18.43                           | 20.27                          | 26        |
| ZIF-7                              | PVDF      | 0.29           | 25                | 1.33×10 <sup>-6</sup>                                                            | 16.32                           | 18.30                          | 43        |
| ZIF-7                              | PSF       | 0.29           | 35                | 2.20×10 <sup>-9</sup>                                                            | 2.4                             | 35.1                           | S3        |
| ZIF-8                              | PSF       | 0.34           | 35                | 4.70×10 <sup>-9</sup>                                                            | 2.6                             | 18.3                           | S3        |
| ZIF-8                              | PSF       | 0.34           | 35                | 2.00×10 <sup>-7</sup>                                                            | -                               | 12.4                           | S4        |
| ZIF-8                              | Polyester | 0.34           | 25                | 1.60×10 <sup>-6</sup>                                                            | -                               | -                              | S5        |
| ZIF-8                              | Nylon     | 0.34           | 25                | 1.97×10 <sup>-6</sup>                                                            | -                               | 4.3                            | S6        |
| ZIF-8                              | Nylon     | 0.34           | 20                | 1.13×10 <sup>-6</sup>                                                            | -                               | 4.6                            | S7        |
| ZIF-8                              | PVDF      | 0.34           | 25                | 2.01×10 <sup>-6</sup>                                                            | 16.3                            | 18.1                           | 26        |
| ZIF-8                              | PVDF      | 0.34           | 25                | 2.44×10 <sup>-6</sup>                                                            | 12.18                           | 14.31                          | 43        |
| ZIF-8                              | PAN       | 0.34           | 20                | 3.05×10 <sup>-7</sup>                                                            | 6.85                            | -                              | 28        |
| ZIF-8                              | Torlon    | 0.34           | 25                | 1.84×10 <sup>-7</sup>                                                            | -                               | -                              | S8        |
| ZIF-8                              | PES       | 0.34           | 60                | 4.00×10 <sup>-7</sup>                                                            | -                               | 9.9                            | 46b       |
| ZIF-90                             | Torlon    | 0.35           | 35                | 1.92×10 <sup>-7</sup>                                                            | 1.8                             | 6.3                            | 25        |
| Cu <sub>3</sub> (BTC) <sub>2</sub> | PSF       | 0.90           | 25                | 4.85×10 <sup>-7</sup>                                                            | 21.03                           | 2.90                           | S9        |
| Cu <sub>3</sub> (BTC) <sub>2</sub> | PSF       | 0.90           | 25                | 7.90×10 <sup>-8</sup>                                                            | 7.2                             | -                              | S10       |
| Cu <sub>3</sub> (BTC) <sub>2</sub> | PAN       | 0.90           | 20                | 9.63×10 <sup>-5</sup>                                                            | 5.6                             | 4.85                           | 28        |
| Cu <sub>3</sub> (BTC) <sub>2</sub> | PVDF      | 0.90           | 25                | 8.46×10 <sup>-6</sup>                                                            | 7.30                            | 5.87                           | 43        |
| Cu <sub>3</sub> (BTC) <sub>2</sub> | PVDF      | 0.90           | 25                | 2.01×10 <sup>-6</sup>                                                            | 8.1                             | 6.5                            | S11       |
| ZIF-8                              | PES       | 0.34           | 20                | 1.11×10 <sup>-7</sup>                                                            | 5.2                             | 22.7                           | This work |

**Table S3** Gas separation properties of the ZIF-8/PVDF, ZIF-8/PSF, ZIF-8/PAN and Cu<sub>3</sub>(BTC)<sub>2</sub>/PES composite membranes at 20 °C.

| Membrane                                | Substrate | Permeance (mol m <sup>-2</sup> s <sup>-1</sup> Pa <sup>-1</sup> ) |                        | Separation factor              |
|-----------------------------------------|-----------|-------------------------------------------------------------------|------------------------|--------------------------------|
|                                         |           | H <sub>2</sub>                                                    | N <sub>2</sub>         | H <sub>2</sub> /N <sub>2</sub> |
| ZIF-8/PVDF                              | PVDF      | 8.66×10 <sup>-7</sup>                                             | 9.77×10 <sup>-8</sup>  | 8.9                            |
| ZIF-8/PSF                               | PSF       | 2.29×10 <sup>-7</sup>                                             | 1.24×10 <sup>-8</sup>  | 18.5                           |
| ZIF-8/PAN                               | PAN       | 1.03×10 <sup>-8</sup>                                             | 8.52×10 <sup>-10</sup> | 12.1                           |
| Cu <sub>3</sub> (BTC) <sub>2</sub> /PES | PES       | 3.43×10 <sup>-6</sup>                                             | 5.62×10 <sup>-7</sup>  | 6.1                            |

The larger H<sub>2</sub> permeance of Cu<sub>3</sub>(BTC)<sub>2</sub>/PES composite membrane was attributed to the larger pore size of the Cu<sub>3</sub>(BTC)<sub>2</sub>. The lower H<sub>2</sub> permeance of ZIF-8/PAN composite membrane was caused by the thicker ZIF-8 layer and the pore shrinkage from cyclization and crosslinking reaction of PAN molecules in the high temperature.<sup>S12</sup> Compared with the ZIF-8/PSF membrane, the relatively higher H<sub>2</sub> permeance of ZIF-8/PVDF composite membrane was resulted from the large pore size of PVDF microfiltration hollow fiber.

**Table S4** The mixture gas permeances and selectivities of the ZIF-8/PES composite membrane (M7).

| Gas <sub>i/j</sub>              | Knudsen constant | Permeance (mol m <sup>-2</sup> s <sup>-1</sup> Pa <sup>-1</sup> ) |                       | Mixture separation factor |
|---------------------------------|------------------|-------------------------------------------------------------------|-----------------------|---------------------------|
|                                 |                  | i                                                                 | j                     |                           |
| H <sub>2</sub> /CO <sub>2</sub> | 4.7              | 9.11×10 <sup>-8</sup>                                             | 1.82×10 <sup>-8</sup> | 5.0                       |
| H <sub>2</sub> /O <sub>2</sub>  | 4.0              | 9.22×10 <sup>-8</sup>                                             | 1.34×10 <sup>-8</sup> | 6.9                       |
| H <sub>2</sub> /N <sub>2</sub>  | 3.7              | 9.29×10 <sup>-8</sup>                                             | 4.56×10 <sup>-9</sup> | 20.4                      |

## Supporting References

- S1 Z. Liu, Z. Jin, W. Li and J. Qiu, *Mater. Lett.*, 2005, **59**, 3620-3625.
- S2 M. Vafaei and M. S. Ghamsari, *Mater. Lett.*, 2007, **61**, 3265-3268.
- S3 F. Cacho-Bailo, S. Catalán-Aguirre, M. Etxeberria-Benavides, O. Karvan, V. Sebastian, C. Téllez and J. Coronas, *J. Membr. Sci.*, 2015, **476**, 277-285.
- S4 F. Cacho-Bailo, B. Seoane, C. Téllez and J. Coronas, *J. Membr. Sci.*, 2014, **464**, 119-126.
- S5 E. Barankova, N. Pradeep and K. V. Peinemann, *Chem. Commun.*, 2013, **49**, 9419-9421.
- S6 J. Yao, D. Dong, D. Li, L. He, G. Xu and H. Wang, *Chem. Commun.*, 2011, **47**, 2559-2561.
- S7 M. He, J. Yao, L. Li, Z. Zhong, F. Chen and H. Wang, *Microporous Mesoporous Mater.*, 2013, **179**, 10-16.
- S8 A. J. Brown, N. A. Brunelli, K. Eum, F. Rashidi, J. R. Johnson, W. J. Koros, C. W. Jones and S. Nair, *Science*, 2014, **345**, 72-75.
- S9 W. Li, G. Zhang, C. Zhang, Q. Meng, Z. Fan and C. Gao, *Chem. Commun.*, 2014, **50**, 3214-3216.
- S10 D. Nagaraju, D. G. Bhagat, R. Banerjee and U. K. Kharul, *J. Mater. Chem. A*, 2013, **1**, 8828-8835.
- S11 Y. Mao, J. Li, W. Cao, Y. Ying, L. Sun and X. Peng, *ACS Appl. Mater. Interfaces*, 2014, **6**, 4473-4479.
- S12 W. Li, Z. Yang, G. Zhang and Q. Meng, *Ind. Eng. Chem. Res.*, 2013, **52**, 6492-6501.
